# Supplementary material for: 1H and 13C chemical shift–structure effects in anhydrous β-caffeine and four caffeine–diacid cocrystals probed by solid-state NMR experiments and DFT calculations
Source: Royal Society of Chemistry journal article supplement (doi:10.1039/d3cp06197c), 2024-01-01
Supplement: d3cp06197c1.pdf [file d3cp06197c1.pdf]

# Electronic Supplementary Information for $^1\text{H}$ and $^{13}\text{C}$ Chemical Shift–Structure Effects in Anhydrous $\beta$ -Caffeine and Four Caffeine–Diacid Cocrystals Probed by Solid-State NMR Experiments and DFT Calculations

Debashis Majhi<sup>†</sup>, Baltzar Stevansson, Tra Mi Nguyen, and Mattias Edén\*

Department of Materials and Environmental Chemistry, Stockholm University,  
SE-106 91 Stockholm, Sweden.

<sup>†</sup>Present address: Department of Chemistry, National Institute of Technology Tiruchirappalli,  
Tiruchirappalli-620015, TamilNadu, India

\*Corresponding author. E-mail: [mattias.eden@mmk.su.se](mailto:mattias.eden@mmk.su.se)

## Contents

- 1. S1.** Aliphatic  $^1\text{H}$  Chemical-Shift Changes Upon Cocrystal Formation.
- 2. Table S1.** Unit-Cell Parameters by Pawley Fitting of XRD Data.
- 3. Table S2.** Cell Parameters in DFT Calculations.
- 4. Table S3.**  $^{13}\text{CH}_3$  Chemical Shifts and HB/TB-Distance Information.
- 5. Table S4.** Experimental  $^{13}\text{C}$  FWHM Values Determined by MAS NMR.
- 6. Table S5.** DFT-Derived  $^1\text{H}$  Chemical Shifts.
- 7. Figure S1.** Powder X-Ray Diffractograms of Cocrystal Precursors and Results from Rietveld Refinements and Pawley Fits.
- 8. Figure S2.** Powder X-Ray Diffractograms of Cocrystals and Results from Rietveld Refinements and Pawley Fits.
- 9. Figure S3.** Deconvolution Results of the  $^{13}\text{C}$  MAS NMR Spectrum of  $\beta$ -Caffeine.
- 10. Figure S4.**  $\Delta_{\text{H}}^j/\Delta r(\text{H}\cdots\text{O}/\text{N})$  Correlation Plot.
- 11. References.**

## S1 Aliphatic $^1\text{H}$ Chemical-Shift Changes Upon Cocrystal Formation

Both the experimental and modeled  $^1\text{H}$  chemical shifts listed in Tables **3** and **4** reveal that the aliphatic  $\text{C}^1\text{H}_2/\text{C}^1\text{H}$  sites of the diacid moieties shield slightly by up to 1 ppm when the cocrystal is formed (i.e.,  $|\Delta_{\text{H}}^j| \lesssim 1$  ppm). Despite the necessity of resorting to "aggregate" ( $\bar{\delta}_{\text{H}}^j$ ) values over 2–3 distinct  $\text{CH}_n$  groups (*vide supra*), the excellent agreement between the  $\bar{\delta}_{\text{H}}^j$  NMR and GIPAW derived shifts of Table **3** suggest accurately modeled  $\{\delta_{\text{H}}^j\}$  values. For instance, from Figs. **5d** and **6d** readily assessed  $\Delta_{\text{H}}^{20/21}$  value accords very well with the GIPAW prediction, as do the "aggregate  $\Delta_{\text{H}}$  value" of the three methylene groups (H15–H17) of GA.

We onwards focus on the caffeine-stemming  $^1\text{H}$  chemical shifts, namely the H4 and methyl (H6–H8) protons. As for the aliphatic  $^1\text{H}$  sites of the diacids, the DFT/GIPAW calculations reproduce the experimental chemical shifts well (Table **3**) but are typically *lower* by  $\lesssim 1$  ppm (except for  $\delta_{\text{H}}^4$ ). Although the total  $^1\text{H}$  NMR-peak overlap among the three  $\text{C}^1\text{H}_3$  sites of  $\beta$ -caffeine (Fig. **6e**) restricts the possibilities to gauge the chemical-shift alteration upon cocrystal formation, the markedly better  $^1\text{H}$  NMR spectral resolution from the cocrystals (Fig. **6**) enables separate  $\delta_{\text{H}}^6$  assessments along with the average/CG chemical shift of  $\text{C}7^1\text{H}_3/\text{C}8^1\text{H}_3$ : both NMR and GIPAW suggest very similar  $\delta_{\text{H}}^6$  and  $\bar{\delta}_{\text{H}}^{7/8}$  values throughout all four cocrystals, *despite* variable HB and TB distances; see Fig. **2** and section **4.7**. This trend translates into a net CG chemical-shift difference of  $\Delta_{\text{H}} \approx 0$  ppm for the  $\text{C}^1\text{H}_3$  groups relative to  $\beta$ -caffeine (Table **S3**), as reproduced by the GIPAW calculations within a minor and near-constant shift displacement ( $\Delta_{\text{H}} \approx 1$  ppm).

Likewise, the  $\text{C}4^1\text{H}$  chemical shift alters only marginally among the various cocrystals, as well as relative to that of  $\beta$ -caffeine. The remarkably small  $^1\text{H}4$  chemical-shift changes—which are observed *both* by NMR and GIPAW calculations—are attributed to the extensive H-bond formation in *both*  $\beta$ -caffeine and all cocrystals, each involving a  $\text{C}4\text{H}\cdots\text{O}$  HB (Fig. **2**), where the five distinct H4 sites of  $\beta$ -caffeine reveal a range of HB distances to neighboring molecules (section **4.2**). Moreover, *despite* that the  $\text{C}4\text{H}\cdots\text{O}$  distance varies between 216 pm in C-GA and 265 pm in C-ME among the cocrystals, a very modest deshielding degree is observed for the cocrystals ( $\Delta_{\text{H}}^j \approx 0.5$  ppm), whereas the DFT-derived counterparts are *even negative* of 1–2 ppm (Table **4**).

**Table S1. Unit-Cell Parameters by Pawley Fitting of XRD Data<sup>a</sup>**

| Phase                          | Cell lengths (Å) |          |          | Cell angles (degrees) |          |          | Space Group                  | CCDC <sup>b</sup> | Ref.      |
|--------------------------------|------------------|----------|----------|-----------------------|----------|----------|------------------------------|-------------------|-----------|
|                                | <i>a</i>         | <i>b</i> | <i>c</i> | $\alpha$              | $\beta$  | $\gamma$ |                              |                   |           |
| $\beta$ -Caffeine              | 42.9556          | 15.0389  | 6.9384   | 90.0000               | 99.0546  | 90.0000  | <i>Cc</i>                    | 610381            | this work |
|                                | 43.0390          | 15.0676  | 6.9531   | 90.0000               | 99.0274  | 90.0000  | <i>Cc</i>                    |                   | S1        |
| $\alpha$ -OA                   | 6.5567           | 6.0939   | 7.8513   | 90.0000               | 90.0000  | 90.0000  | <i>Pbca</i>                  | 1854356           | this work |
|                                | 6.5678           | 6.0983   | 7.8715   | 90.0000               | 90.0000  | 90.0000  | <i>Pbca</i>                  |                   | S2        |
| $\alpha$ -OA·2H <sub>2</sub> O | 6.1076           | 3.6096   | 12.1119  | 90.0000               | 106.2771 | 90.0000  | <i>P2<sub>1</sub>/n</i>      | 703783            | this work |
|                                | 6.1169           | 3.6053   | 12.0490  | 90.0000               | 106.3030 | 90.0000  | <i>P2<sub>1</sub>/n</i>      |                   | S3        |
| $\beta$ -MA                    | 5.1573           | 5.3420   | 8.4052   | 108.5191              | 100.6892 | 94.9623  | <i>P<math>\bar{1}</math></i> | 929777            | this work |
|                                | 5.1582           | 5.3401   | 8.4024   | 108.4860              | 100.7120 | 94.9500  | <i>P<math>\bar{1}</math></i> |                   | S4        |
| $\beta$ -GA                    | 12.9062          | 4.8234   | 9.9535   | 90.0000               | 96.8570  | 90.0000  | <i>C2/c</i>                  | 1169312           | this work |
|                                | 12.9680          | 4.8296   | 9.9820   | 90.0000               | 96.8720  | 90.0000  | <i>C2/c</i>                  |                   | S5        |
| I-ME                           | 7.6394           | 10.1149  | 7.6392   | 90.0000               | 119.3036 | 90.0000  | <i>P2<sub>1</sub>/c</i>      | 1435260           | this work |
|                                | 7.1511           | 10.1107  | 7.6405   | 90.0000               | 119.4050 | 90.0000  | <i>P2<sub>1</sub>/c</i>      |                   | S6        |
| 2C-OA                          | 4.4361           | 14.8522  | 16.0758  | 90.0000               | 97.4556  | 90.0000  | <i>P2<sub>1</sub>/c</i>      | 272620            | this work |
|                                | 4.4143           | 14.7701  | 15.9119  | 90.0000               | 96.4850  | 90.0000  | <i>P2<sub>1</sub>/c</i>      |                   | S7        |
| 2C-MA                          | 30.5951          | 31.3857  | 4.7008   | 90.0000               | 90.0000  | 90.0000  | <i>Fdd2</i>                  | 272621            | this work |
|                                | 30.3992          | 31.2845  | 4.6739   | 90.0000               | 90.0000  | 90.0000  | <i>Fdd2</i>                  |                   | S7        |
| C-GA                           | 8.3651           | 8.6844   | 11.4829  | 69.3951               | 77.9667  | 74.7729  | <i>P<math>\bar{1}</math></i> | 229593            | this work |
|                                | 8.3212           | 8.6667   | 11.3636  | 68.9550               | 78.5590  | 74.2360  | <i>P<math>\bar{1}</math></i> |                   | S7        |
| C-ME                           | 7.0312           | 12.5188  | 15.8410  | 90.0000               | 93.2495  | 90.0000  | <i>P2<sub>1</sub>/n</i>      | 272622            | this work |
|                                | 6.8565           | 12.5051  | 15.8362  | 90.0000               | 93.6100  | 90.0000  | <i>P2<sub>1</sub>/n</i>      |                   | S7        |

<sup>a</sup> Unit cell parameters obtained by Pawley fitting of the PXRD data of Figs. **S1** and **S2** by using the TOPAS software<sup>S8</sup> (first line of each entry), along with the input parameters reported previously (second line) by the as-stated source (rightmost column).

<sup>b</sup> Deposition number in the Cambridge crystallographic data center.

**Table S2. Cell Parameters in DFT Calculations<sup>a</sup>**

| Phase                          | Cell lengths (Å) |          |          | Cell angles (degrees) |          |          | Space Group                  | CCDC <sup>b</sup> | Ref.      |
|--------------------------------|------------------|----------|----------|-----------------------|----------|----------|------------------------------|-------------------|-----------|
|                                | <i>a</i>         | <i>b</i> | <i>c</i> | $\alpha$              | $\beta$  | $\gamma$ |                              |                   |           |
| $\beta$ -Caffeine              | 22.8002          | 22.8002  | 6.9531   | 98.5165               | 98.5165  | 38.5894  | <i>P1</i>                    | 610381            | S1        |
|                                | 22.3089          | 22.3089  | 6.4195   | 102.0568              | 102.0568 | 37.8282  | <i>P1</i>                    |                   | this work |
| $\alpha$ -OA                   | 6.5678           | 6.0983   | 7.8715   | 90.0000               | 90.0000  | 90.0000  | <i>Pbca</i>                  | 1854356           | S2        |
| $\alpha$ -OA·2H <sub>2</sub> O | 6.1169           | 3.6053   | 14.9658  | 90.0000               | 129.4000 | 90.0000  | <i>P2<sub>1</sub>/c</i>      | 703783            | S3        |
| $\beta$ -MA                    | 5.1582           | 5.3401   | 8.4024   | 108.4860              | 100.7120 | 94.9500  | <i>P<math>\bar{1}</math></i> | 929777            | S4        |
| $\beta$ -GA                    | 12.9769          | 4.7484   | 9.6955   | 90.0000               | 98.3000  | 90.0000  | <i>C2/c</i>                  | 1169311           | S5        |
|                                | 12.7258          | 4.4911   | 9.2097   | 90.0000               | 99.4700  | 90.0000  | <i>C2/c</i>                  |                   | this work |
| I-ME                           | 7.1511           | 10.1107  | 7.6405   | 90.0000               | 119.4050 | 90.0000  | <i>P2<sub>1</sub>/c</i>      | 1435260           | S6        |
|                                | 6.5778           | 9.7388   | 7.0958   | 90.0000               | 116.2407 | 90.0000  | <i>P2<sub>1</sub>/c</i>      |                   | this work |
| 2C-OA                          | 4.4143           | 14.7701  | 15.9119  | 90.0000               | 96.4850  | 90.0000  | <i>P2<sub>1</sub>/c</i>      | 272620            | S7        |
| 2C-MA                          | 30.3992          | 31.2845  | 4.6739   | 90.0000               | 90.0000  | 90.0000  | <i>Fdd2</i>                  | 272621            | S7        |
| C-GA                           | 8.3212           | 8.6667   | 11.3636  | 68.9550               | 78.5590  | 74.2360  | <i>P<math>\bar{1}</math></i> | 229593            | S7        |
|                                | 7.9625           | 8.4191   | 10.9214  | 68.4349               | 79.9799  | 73.5924  | <i>P<math>\bar{1}</math></i> |                   | this work |
| C-ME                           | 6.8565           | 12.5051  | 17.6485  | 90.0000               | 116.4200 | 90.0000  | <i>P2<sub>1</sub>/c</i>      | 272622            | S7        |
|                                | 6.3348           | 12.2965  | 17.0267  | 90.0000               | 115.1100 | 90.0000  | <i>P2<sub>1</sub>/c</i>      |                   | this work |

<sup>a</sup> Unit cell parameters (from the as-indicated source) as input to the CASTEP software after conversion of the parameters listed in Table S1 by the CIF2Cell program (version 1.2.10).<sup>S9</sup> The <sup>1</sup>H/<sup>13</sup>C chemical shifts reported herein were obtained by an initial energy optimization by DFT, during which only the H atom positions were adjusted. For the { $\beta$ -caffeine,  $\beta$ -GA, I-ME, C-GA, C-ME} structures, an additional DFT optimization was performed, where all cell parameters *and* atom positions were adjusted freely, giving the refined {*a*, *b*, *c*} and { $\alpha$ ,  $\beta$ ,  $\gamma$ } values listed as "this work". However, except for  $\beta$ -caffeine, that gave no improvements relative to experiments; see section 4.3.

<sup>b</sup> Deposition number in the Cambridge crystallographic data center.

**Table S3.**  $^{13}\text{C}\text{H}_3$  Chemical Shifts and HB/TB-Distance Information<sup>a</sup>

|                                                          | 2C-OA                          | 2C-MA                                        | C-GA                                        | C-ME                                                       | $\beta$ -Caffeine <sup>b</sup> | Site          |
|----------------------------------------------------------|--------------------------------|----------------------------------------------|---------------------------------------------|------------------------------------------------------------|--------------------------------|---------------|
| <b>C6H<sub>3</sub></b>                                   |                                |                                              |                                             |                                                            |                                |               |
| NMR: $\delta_{\text{C}}^6$ ; $\Delta_{\text{C}}^6$ (ppm) | 36.5; 1.4                      | 34.0; -1.0                                   | 34.3; -0.7                                  | 36.5; 1.5                                                  |                                |               |
| DFT: $\delta_{\text{C}}^6$ ; $\Delta_{\text{C}}^6$ (ppm) | 36.2; 0.9                      | 33.0; -2.3                                   | 33.5; -1.7                                  | 36.6; 1.4                                                  |                                |               |
| HB: $\text{CH}_3 \cdots \text{O}$ (pm)                   | 223(O1)<br>292(O2)             | 241(O2)<br>292(O1)                           | 234(O1)<br>236(O18)<br>278(O14H)            | 249(O19H)<br>259(O2)<br>267(O22)                           | 207; 240; 259<br>234; 276      | O2<br>O1      |
| TB: $\text{CH}_3 \cdots \text{O}$ (pm)                   | 323(O1)<br>325(O2)<br>354(O1)  | 342(O2)<br>369(O1)                           | 337(O18)<br>343(O1)<br>371(O14H)            | 333(O22)<br>337(O2)<br>349(O22)                            | 291; 294; 312<br>301; 301      | O2<br>O1      |
| <b>C7H<sub>3</sub></b>                                   |                                |                                              |                                             |                                                            |                                |               |
| NMR: $\delta_{\text{C}}^7$ ; $\Delta_{\text{C}}^7$ (ppm) | 31.1; 0.4                      | 31.6; 0.9                                    | 31.5; 0.8                                   | 31.4; 0.7                                                  |                                |               |
| DFT: $\delta_{\text{C}}^7$ ; $\Delta_{\text{C}}^7$ (ppm) | 28.5; -1.1                     | 30.0; 0.3                                    | 29.1; -0.6                                  | 29.7; 0.0                                                  |                                |               |
| HB: $\text{CH}_3 \cdots \text{O/N}$ (pm)                 | 255(O1)<br>260(O9H)<br>292(O1) | 261(O1)<br>269(O11H)<br>280(O2)<br>327(O11H) | 272(O14H)<br>272(O1)<br>278(O18)<br>305(O1) | 257(O22)<br>260(O19H)<br>265(O22H)<br>266(O22)<br>290(O22) | 252; 264<br>271; 296<br>281    | N<br>O1<br>O2 |
| TB: $\text{CH}_3 \cdots \text{O/N}$ (pm)                 | 329(O1)<br>337(O9H)<br>349(O2) | 304(O1)<br>353(O11H)<br>353(O2)              | 347(O1)<br>354(O18)<br>356(O1)<br>362(O14H) | 340(O22)<br>342(O19H)<br>356(O19H)<br>356(O22)             | 338; 346<br>345<br>363; 392    | N<br>O2<br>O1 |
| <b>C8H<sub>3</sub></b>                                   |                                |                                              |                                             |                                                            |                                |               |
| NMR: $\delta_{\text{C}}^8$ ; $\Delta_{\text{C}}^8$ (ppm) | 27.9; -1.7                     | 28.3; -1.3                                   | 27.8; -1.8                                  | 29.0; -0.7                                                 |                                |               |
| DFT: $\delta_{\text{C}}^8$ ; $\Delta_{\text{C}}^8$ (ppm) | 25.2; -4.3                     | 25.8; -3.7                                   | 24.2; -5.3                                  | 27.4; -2.0                                                 |                                |               |
| HB: $\text{CH}_3 \cdots \text{O/N}$ (pm)                 | 272(O9H)<br>285(O9)            | 245(O11)<br>262(O11)                         | 255(O18H)<br>339(O14)                       | 266(O19)<br>272(O2)<br>286(O19)                            | 236; 266<br>258; 281<br>294    | O2<br>O1<br>N |
| TB: $\text{CH}_3 \cdots \text{O/N}$ (pm)                 | 339(O9)<br>340(O9H)            | 312(O11)<br>343(O11)                         | 321(O18H)<br>354(O18H)                      | 315(O22H)<br>354(O19)                                      | 318; 341<br>326; 353<br>340    | O2<br>O1<br>N |

<sup>a</sup> A compilation of the methyl-group-associated  $^{13}\text{C}$  chemical shifts  $\{\delta_{\text{C}}^6, \delta_{\text{C}}^7, \delta_{\text{C}}^8\}$  of the caffeine-moiety in the cocrystals and their  $\Delta_{\text{C}}^j$  counterparts relative to  $\beta$ -caffeine [eqn (6)], as deduced from either  $^{13}\text{C}$  NMR experiments or DFT/GIPAW calculations. The chemical shifts are contrasted with the DFT-derived set of shortest HB ( $\text{CH}_3 \cdots \text{O}$ ) and TB ( $\text{CH}_3 \cdots \text{O}$ ) distances in each cocrystal (and thereby most influential on  $\delta_{\text{C}}^j/\Delta_{\text{C}}^j$ ; see Fig. 2), listed with increasing distance from top to bottom. Note that for graphical visualization limitations, some of the shortest distances are not indicated in Fig. 2.

<sup>b</sup> The shortest HB/TB distances encountered for the five crystallographically unique caffeine sites/molecules of the DFT-refined structure along with the identity of the O1/O2/N atom involved in the bond (specified in the rightmost column). Note that *all five* HB/TB distances listed for  $\beta$ -caffeine contribute to each respective  $^{13}\text{C}6$ - $^{13}\text{C}8$  chemical shift, as opposed to the distance counterparts of the cocrystals that involve multiple distances from *one* unique  $^{13}\text{C}$  site, whose impact on its chemical shift decreases drastically for increasing HB/TB distance.

**Table S4. Experimental  $^{13}\text{C}$  FWHM Values Determined by MAS NMR<sup>a</sup>**

| Coformer                               | Site  | Coformer      | 2C-OA         | 2C-MA         | C-GA          | C-ME          |
|----------------------------------------|-------|---------------|---------------|---------------|---------------|---------------|
|                                        |       | fwhm<br>(ppm) | fwhm<br>(ppm) | fwhm<br>(ppm) | fwhm<br>(ppm) | fwhm<br>(ppm) |
| $\beta$ -Caffeine                      | C1    | 1.90          | 0.72          | 0.38          | 0.80          | 1.07          |
|                                        | C2    | n.d.          | 0.84          | 0.56          | 0.91          | 1.14          |
|                                        | C3    | n.d.          | 0.81          | 0.49          | 0.86          | 1.16          |
|                                        | C4    | 2.88          | 0.83          | 0.42          | 0.90          | 1.16          |
|                                        | C5    | 1.33          | 0.75          | 0.43          | 0.83          | 1.08          |
|                                        | C6    | 2.36          | 0.78          | 0.36          | 0.89          | 1.10          |
|                                        | C7    | n.d.          | 0.79          | 0.42          | 1.01          | 1.16          |
|                                        | C8    | n.d.          | 0.81          | 0.41          | 0.84          | 1.17          |
| $\alpha$ -OA                           | C9/10 | 0.61          | 0.73          |               |               |               |
| $\alpha$ -OA $\cdot$ 2H <sub>2</sub> O | C9/10 | 0.68          | 0.73          |               |               |               |
| $\beta$ -MA                            | C11   | 0.19          | 0.30          |               |               |               |
|                                        | C12   | 0.21          | 0.22          |               |               |               |
|                                        | C13   | 0.19          | 0.30          |               |               |               |
| $\beta$ -GA                            | C14   | 0.59          | 0.79          |               |               |               |
|                                        | C15   | 0.81          | 1.10          |               |               |               |
|                                        | C16   | 0.89          | 1.09          |               |               |               |
|                                        | C17   | 0.81          | n.d.          |               |               |               |
|                                        | C18   | 0.59          | 0.78          |               |               |               |
| I-ME                                   | C19   | 1.60          | 1.06          |               |               |               |
|                                        | C20   | 1.58          | 1.13          |               |               |               |
|                                        | C21   | 1.53          | 1.12          |               |               |               |
|                                        | C22   | 1.58          | 1.04          |               |               |               |

<sup>a</sup> FWHM (within  $\pm 0.05$  ppm) of each  $^{13}\text{C}$  NMR peak observed in the spectra from the cocrystals and their precursor phases. Only data for sufficiently resolved resonances are listed.

**Table S5. DFT-Derived  $^1\text{H}$  Chemical Shifts<sup>a</sup>**

| Coformer                               | Site             | Coformer                       | 2C-OA                          | 2C-MA                          | C-GA                           | C-ME                           |
|----------------------------------------|------------------|--------------------------------|--------------------------------|--------------------------------|--------------------------------|--------------------------------|
|                                        |                  | $\delta_{\text{H}}/\text{ppm}$ | $\delta_{\text{H}}/\text{ppm}$ | $\delta_{\text{H}}/\text{ppm}$ | $\delta_{\text{H}}/\text{ppm}$ | $\delta_{\text{H}}/\text{ppm}$ |
| $\beta$ -caffeine                      | H4               | 8.4                            | 7.2                            | 7.6                            | 7.3                            | 6.7                            |
|                                        | H6               | 4.5                            | 3.7                            | 3.8                            | 3.5                            | 3.2                            |
|                                        | H7               | 3.6                            | 2.5                            | 2.8                            | 2.4                            | 2.6                            |
|                                        | H8               | 3.5                            | 1.8                            | 1.8                            | 2.2                            | 2.0                            |
| $\alpha$ -OA                           | HO9/10           | 11.2                           | 15.0                           |                                |                                |                                |
| $\alpha$ -OA $\cdot$ 2H <sub>2</sub> O | HO9/10           | 17.8                           | 15.0                           |                                |                                |                                |
|                                        | H <sub>2</sub> O | 5.1/6.0                        |                                |                                |                                |                                |
| $\beta$ -MA                            | HO11             | 13.7                           | 14.8                           |                                |                                |                                |
|                                        | H12a             | 2.7                            | 1.7                            |                                |                                |                                |
|                                        | H12b             | 2.5                            | 1.7                            |                                |                                |                                |
|                                        | HO13             | 13.4                           | 14.8                           |                                |                                |                                |
| $\beta$ -GA                            | HO14             | 13.7                           | 14.0                           |                                |                                |                                |
|                                        | H15a             | 1.6                            | 1.4                            |                                |                                |                                |
|                                        | H15b             | 1.2                            | 1.5                            |                                |                                |                                |
|                                        | H16a             | 0.2                            | 0.3                            |                                |                                |                                |
|                                        | H16b             | 0.2                            | 0.4                            |                                |                                |                                |
|                                        | H17a             | 1.6                            | 0.9                            |                                |                                |                                |
|                                        | H17b             | 1.2                            | 1.7                            |                                |                                |                                |
|                                        | HO18             | 13.7                           | 10.6                           |                                |                                |                                |
| I-ME                                   | HO19             | 13.6                           | 20.2                           |                                |                                |                                |
|                                        | H20              | 6.1                            | 4.8                            |                                |                                |                                |
|                                        | H21              | 6.3                            | 4.9                            |                                |                                |                                |
|                                        | HO22             | 16.2                           | 14.6                           |                                |                                |                                |

<sup>a</sup> The entire set of DFT/GIPAW-derived  $^1\text{H}$  chemical shifts from the unique  $^1\text{H}_j$  site of each sample.

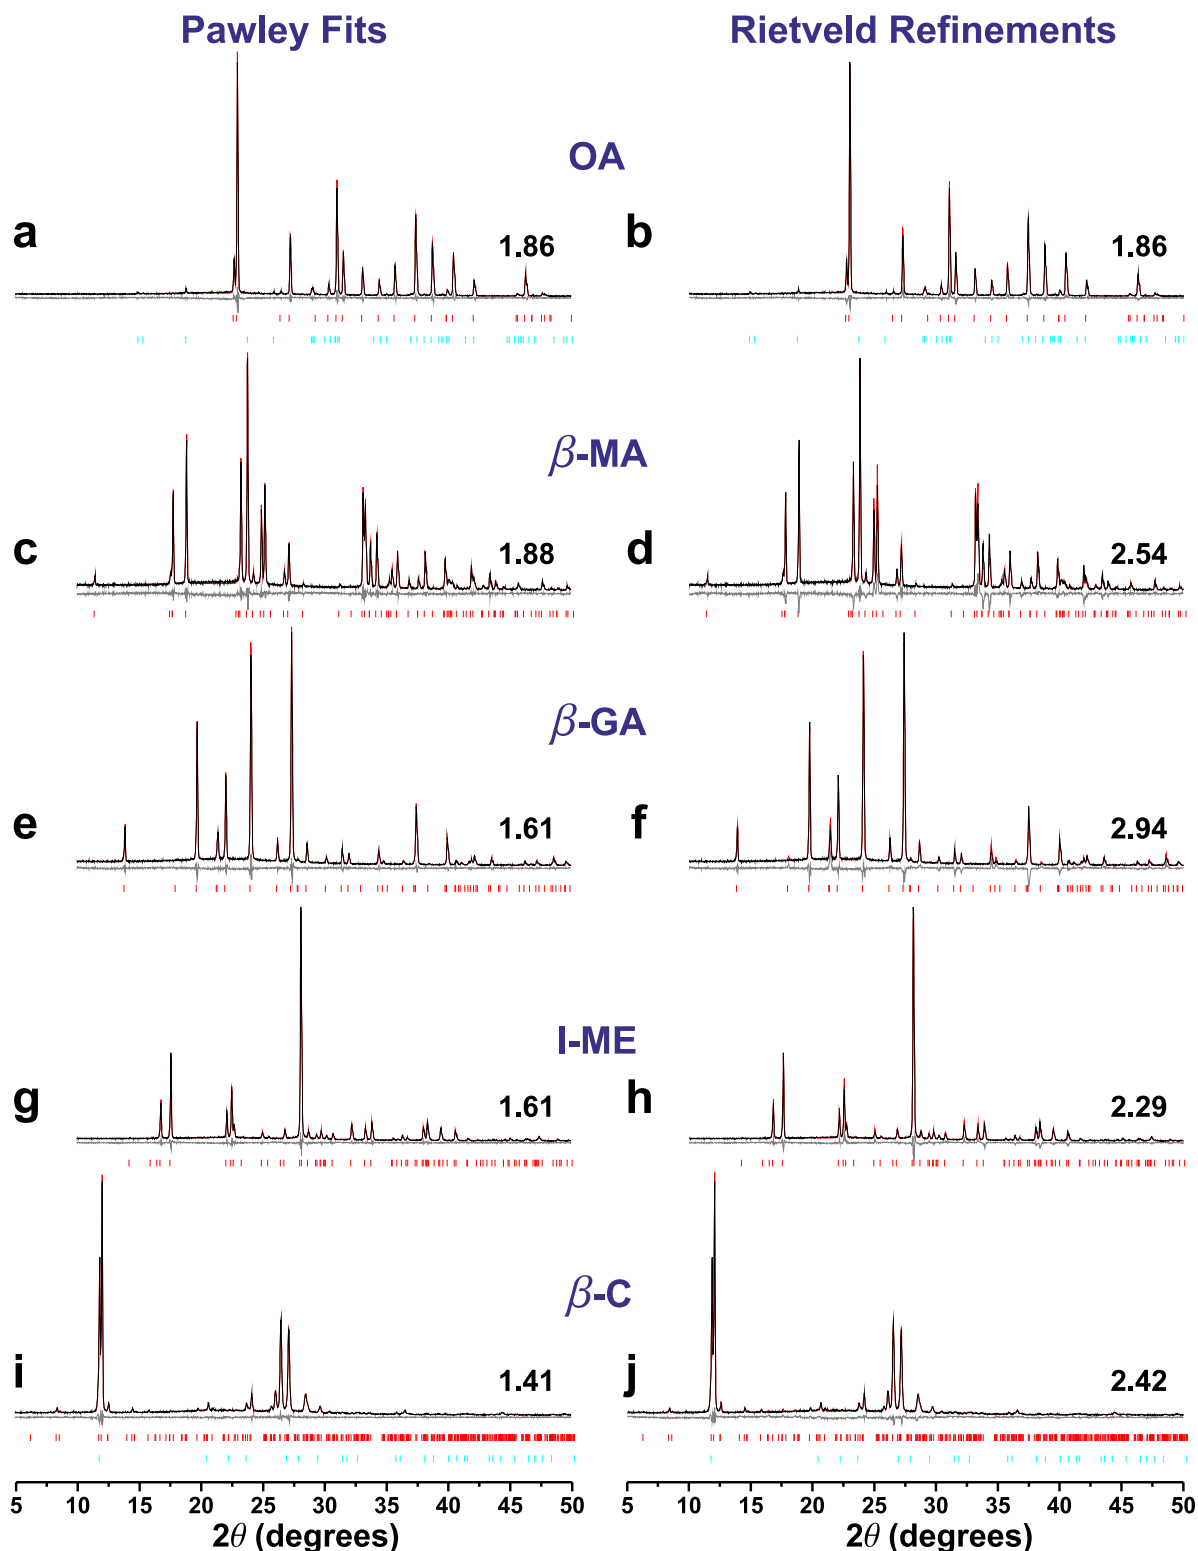

**Fig. S1.** Powder diffractograms (black traces) and best-fit results (red traces) by Pawley (left column) and Rietveld (right column) analyses for the cocrystal precursors of (a, b)  $\alpha$ -OA/ $\alpha$ -OA $\cdot$ 2H<sub>2</sub>O mixture (“OA”), (c, d) malonic acid ( $\beta$ -MA), (e, f) glutaric acid ( $\beta$ -GA), (g, h) maleic acid (I-ME), and (i, j) anhydrous  $\beta$ -caffeine ( $\beta$ -C), for the structures presented in Table S1. Each number at the right diffractogram portion specifies the “goodness-of-fit”,<sup>S8</sup> while the grey curve beneath each PXRD pattern represents the difference between the experiment and best fit. The red and cyan Bragg-peak markers in (a, b) correspond to the peak positions from the  $\alpha$ -OA and  $\alpha$ -OA $\cdot$ 2H<sub>2</sub>O phases, respectively, whereas those in (i, j) mark the peaks from anhydrous  $\beta$ -caffeine (red; Table S1) and  $\alpha$ -caffeine (cyan; space group  $R\bar{3}c$ ; CCDC 274185<sup>S10</sup>).



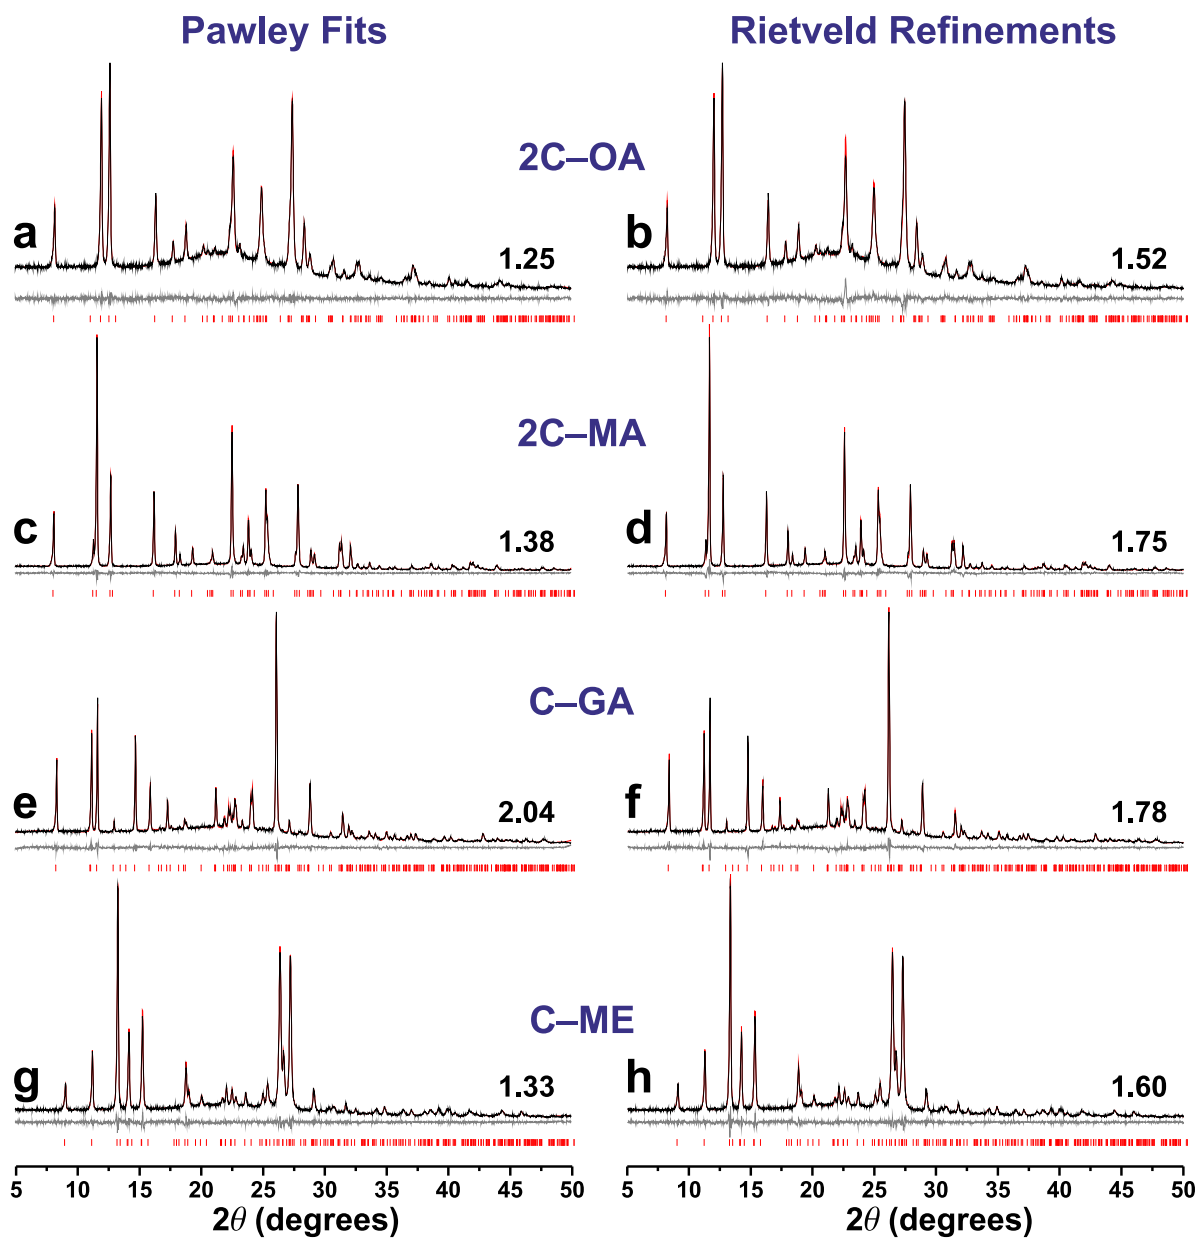

**Fig. S2.** Powder diffractograms (black traces) and best-fit results (red traces) by the Pawley (left column) and Rietveld (right column) methods for the (a, b) 2C–OA, (c, d) 2C–MA, (e, f) C–GA, (g, h) C–ME cocrystals (see Table S1). Each number at the right diffractogram portion specifies the “goodness-of-fit”,<sup>S8</sup> while the grey curve beneath each PXR D pattern represents the difference between the experiment and best fit.

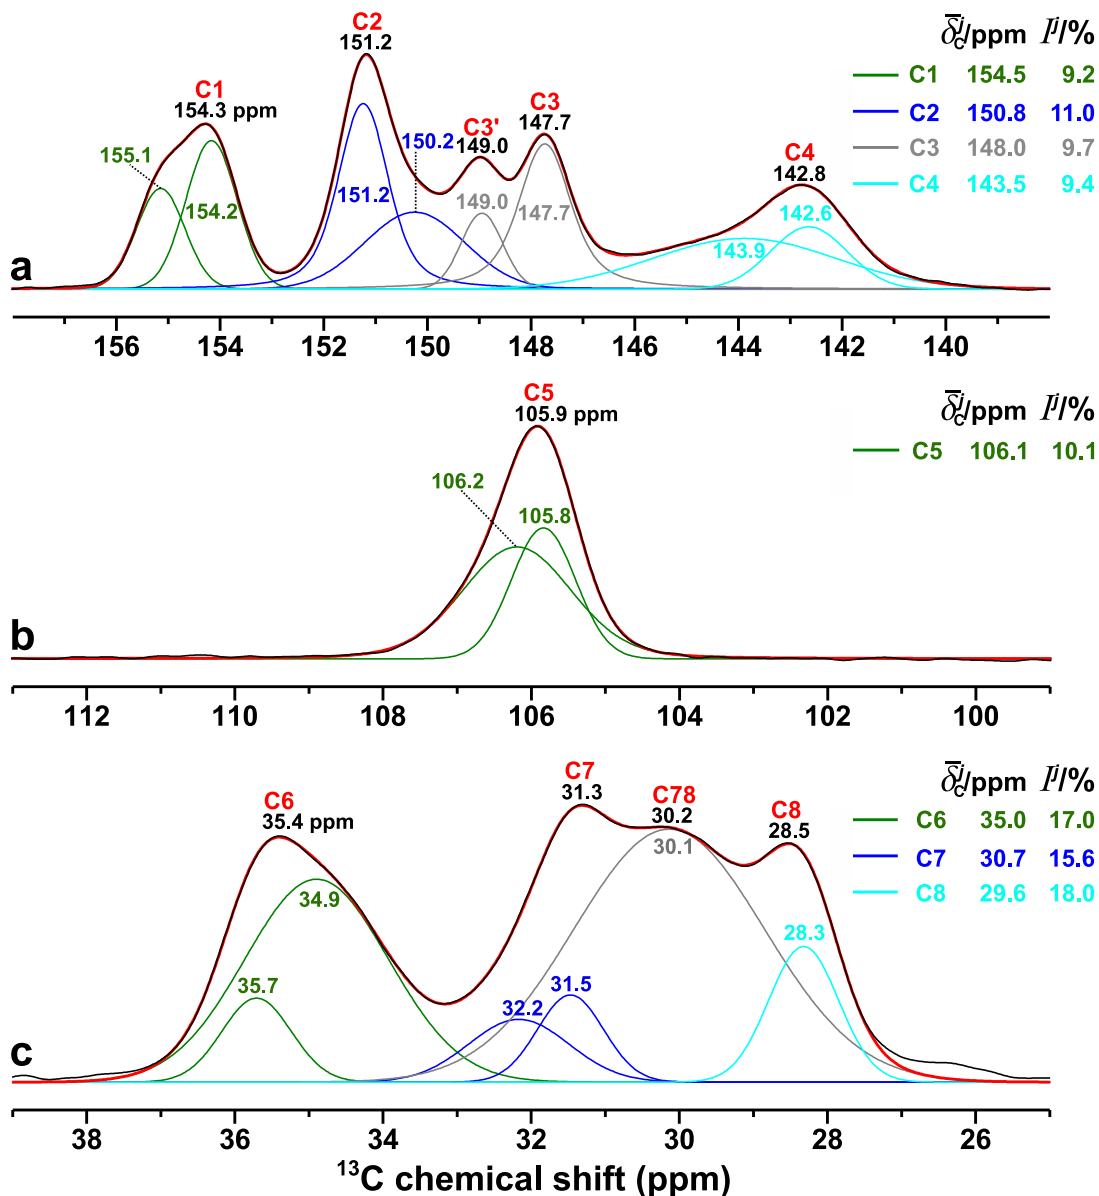

**Fig. S3.** Experimental  $^{13}\text{C}$  MAS NMR spectrum (black traces) of anhydrous  $\beta$ -caffeine (Fig. 3e), shown together with its best-fit result (red traces) and deconvolutions into component peaks stemming from the eight distinct  $^{13}\text{C}$  sites (C1–C8), where all NMR peaks associated with a given site are presented with the same color (see legends). All numbers (in ppm) above each  $^{13}\text{C}$  peak represents its chemical shift at the peak maximum. The legends list each center-of-gravity shift ( $\bar{\delta}_C^j$ ) together with its associated fraction ( $I^j$ ) contributed by site  $^{13}\text{C}^j$  (out of the total spectral intensity), which was obtained by the sum over all its peak components. Note that panels (a–c) employ different vertical scales.

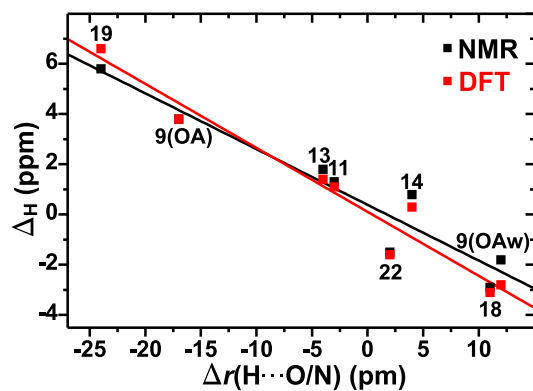

**Fig. S4.** Experimental (black symbols) and DFT-generated (red)  $^1\text{H}$  chemical-shift differences [ $\Delta_{\text{H}}^j$ ; eqn (5)] plotted against the difference in HB distance,  $\Delta r(\text{H}\cdots\text{O}/\text{N})$ , between the carboxy moieties of the cocrystal and its diacid precursor. The black and red lines are best-fit results, yielding the respective expressions  $\Delta_{\text{H}}^j[\text{NMR}]/\text{ppm} = 0.385 - 0.222\Delta r(\text{H}\cdots\text{O}/\text{N})/\text{pm}$  ( $R^2 = 0.915$ ), and  $\Delta_{\text{H}}^j[\text{DFT}]/\text{ppm} = 0.107 - 0.255\Delta r(\text{H}\cdots\text{O}/\text{N})/\text{pm}$  ( $R^2 = 0.943$ ).

## References

- (S1) C. W. Lehmann and F. Stowasser, The crystal structure of anhydrous  $\beta$ -caffeine as determined from X-ray powder-diffraction data, *Chem. Eur. J.*, 2007, **13**, 2908–2911.
- (S2) S. Bhattacharya, Thermal expansion and dimensionality of a hydrogen bond network: a case study on dimorphic oxalic acid, *CrystEngComm*, 2020, **22**, 7896–7902.
- (S3) N. Casati, P. Macchi, and A. Sironi, Hydrogen migration in oxalic acid di-hydrate at high pressure?, *Chem. Commun.*, 2009, pp. 2679–2681.
- (S4) S. Bhattacharya, V. G. Saraswatula, and B. K. Saha, Thermal expansion in alkane diacids—another property showing alternation in an odd–even series, *Cryst. Growth Des.*, 2013, **13**, 3651–3656.
- (S5) V. R. Thalladi, M. Nüsse, and R. Boese, The melting point alternation in  $\alpha,\omega$ -alkanedicarboxylic acids, *J. Am. Chem. Soc.*, 2000, **122**, 9227–9236.
- (S6) D. Rychkov, S. Arkhipov, and E. Boldyreva, Structure-forming units of amino acid maleates. Case study of L-valinium hydrogen maleate, *Acta Cryst.*, 2016, **B72**, 160–163.
- (S7) A. V. Trask, W. D. S. Motherwell, and W. Jones, Pharmaceutical cocrystallization: Engineering a remedy for caffeine hydration, *Cryst. Growth Des.*, 2005, **5**, 1013–1021.
- (S8) A. Coelho, TOPAS-academic v6, *Coelho Software*, 2016.
- (S9) T. Björkman, CIF2Cell: Generating geometries for electronic structure programs, *Comp. Phys. Commun.*, 2011, **182**, 1183–1186.
- (S10) G. D. Enright, V. V. Terskikh, D. H. Brouwer, and J. A. Ripmeester, The structure of two anhydrous polymorphs of caffeine from single-crystal diffraction and ultrahigh-field solid-state  $^{13}\text{C}$  NMR spectroscopy, *Cryst. Growth Des.*, 2007, **7**, 1406–1410.
